# Supplementary material for: Maleimides Designed for Self-Assembly and Reactivity on Graphene
Source: MDPI journal article supplement (doi:10.3390/molecules201018856), 2015-10-16
Supplement: s1 [file s1]

## Supplementary Materials

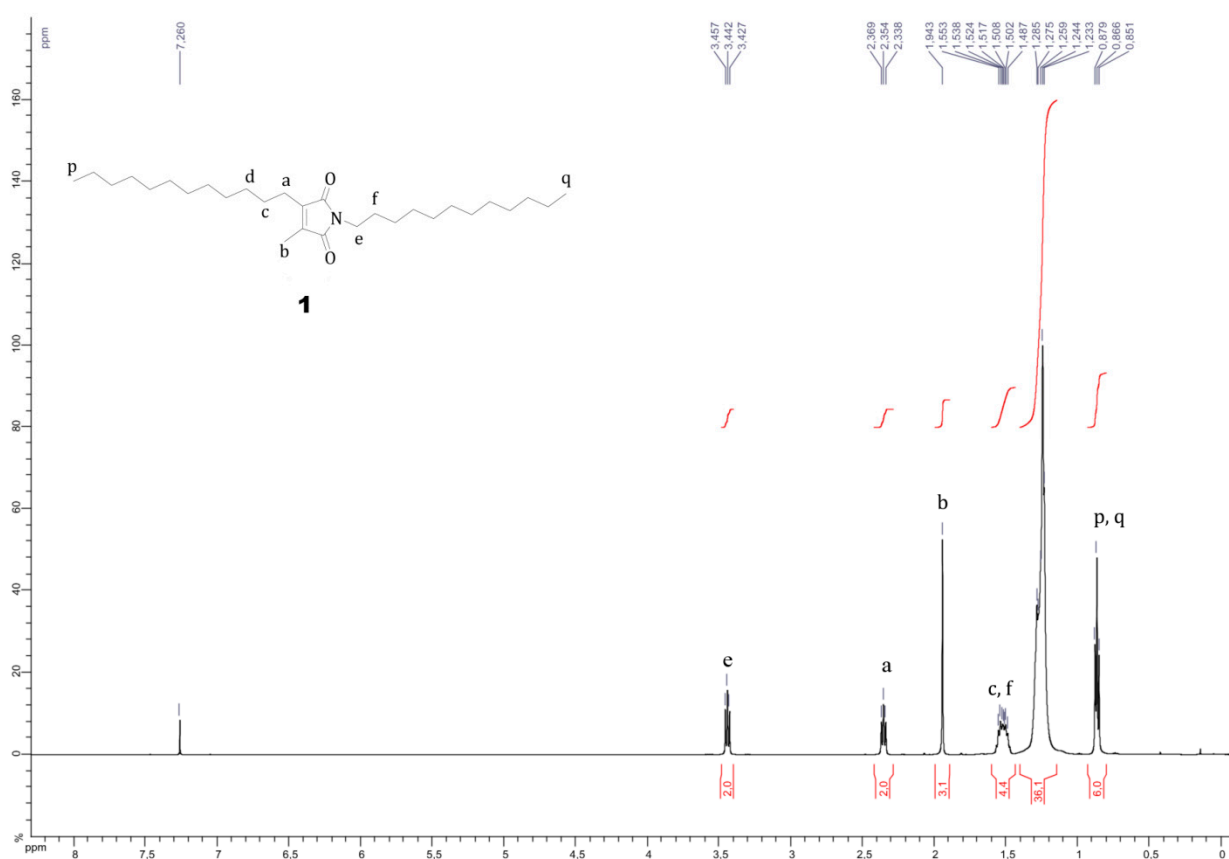

**Figure S1.**  $^1\text{H}$ -NMR of compound **1**.

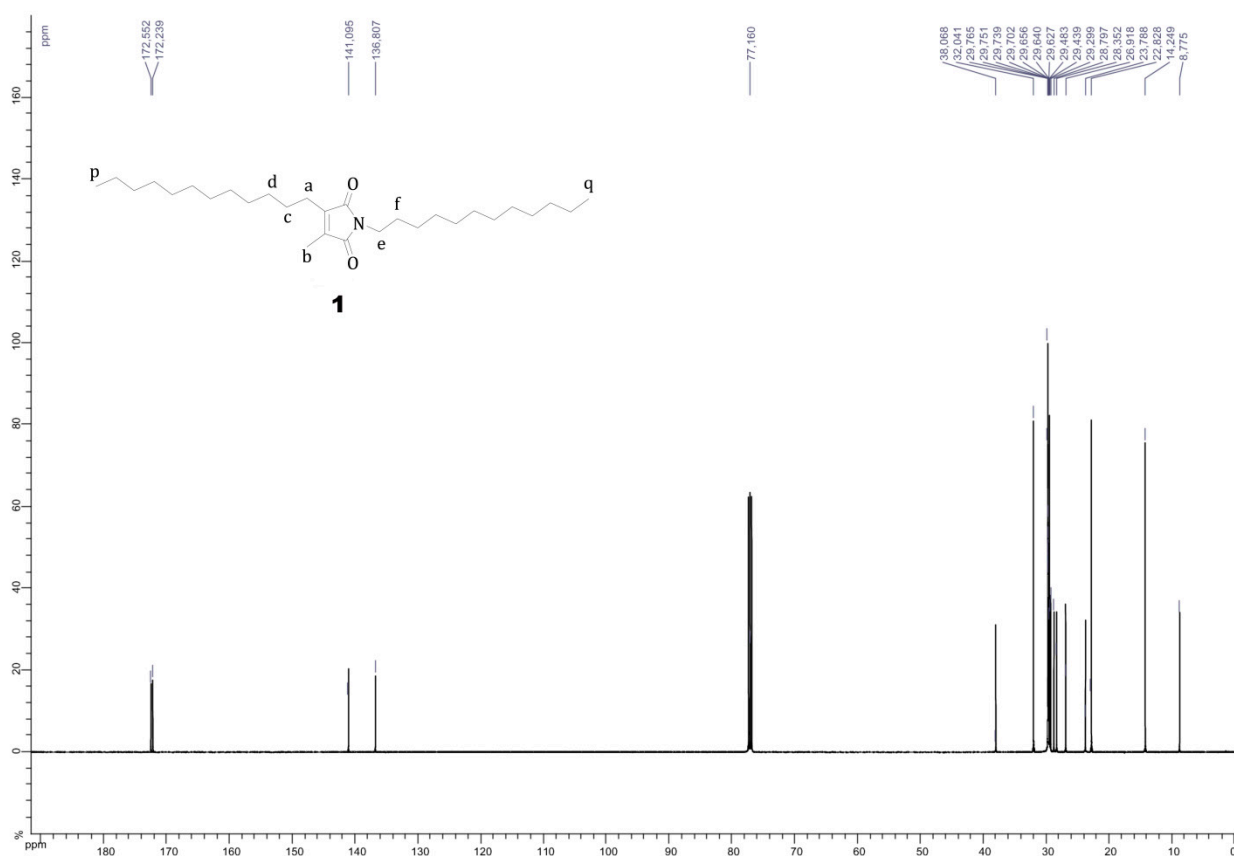

**Figure S2.**  $^{13}\text{C}$ -NMR of compound **1**.

**Figure S3.**  $^1\text{H}$ -NMR of compound **2**.

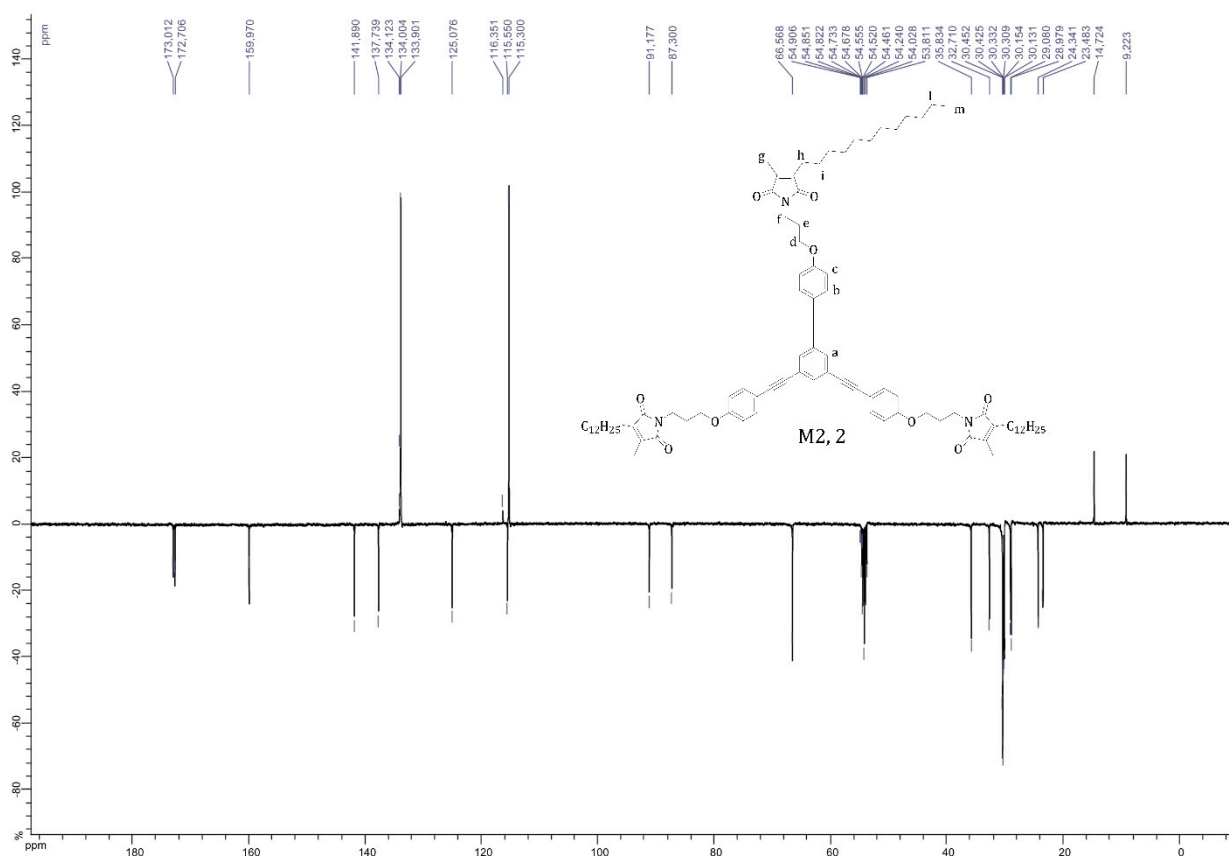

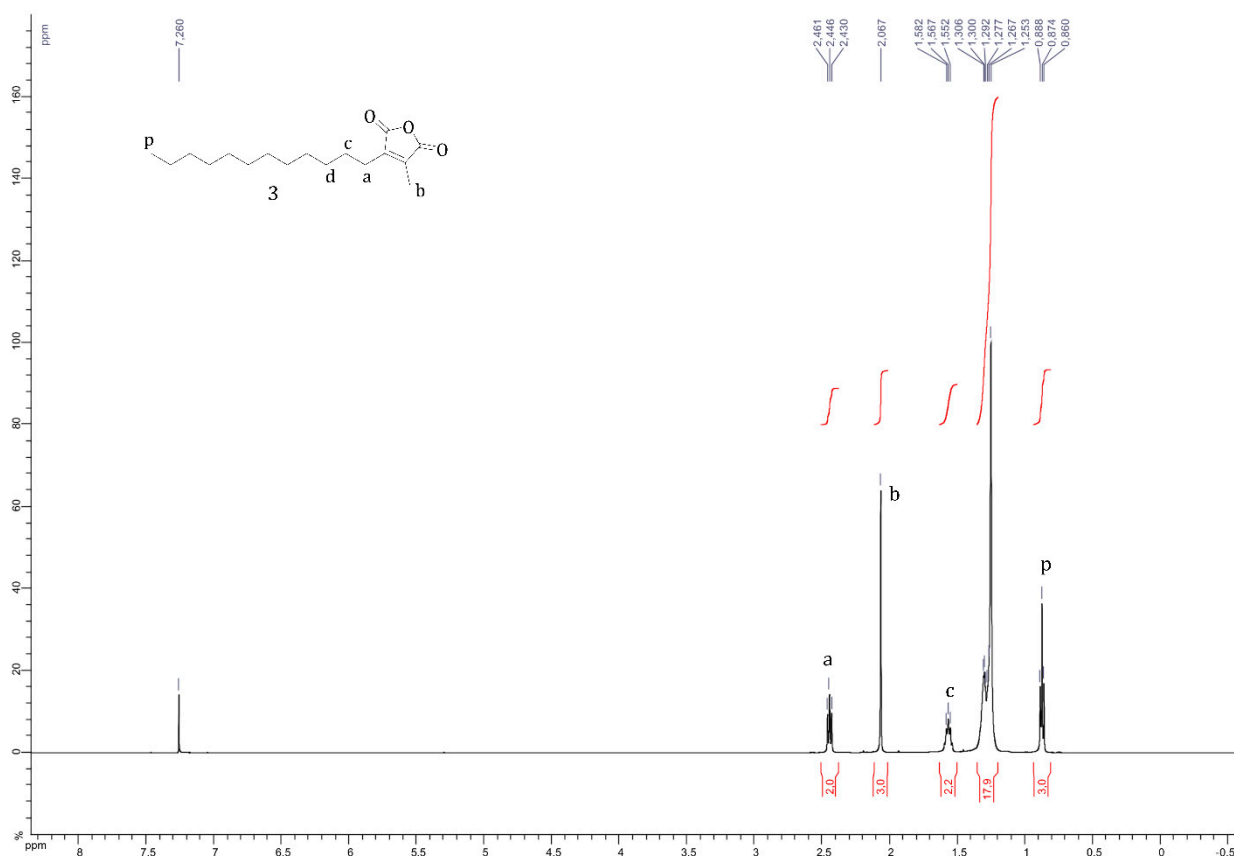

Figure S5. <sup>1</sup>H-NMR of compound 3.

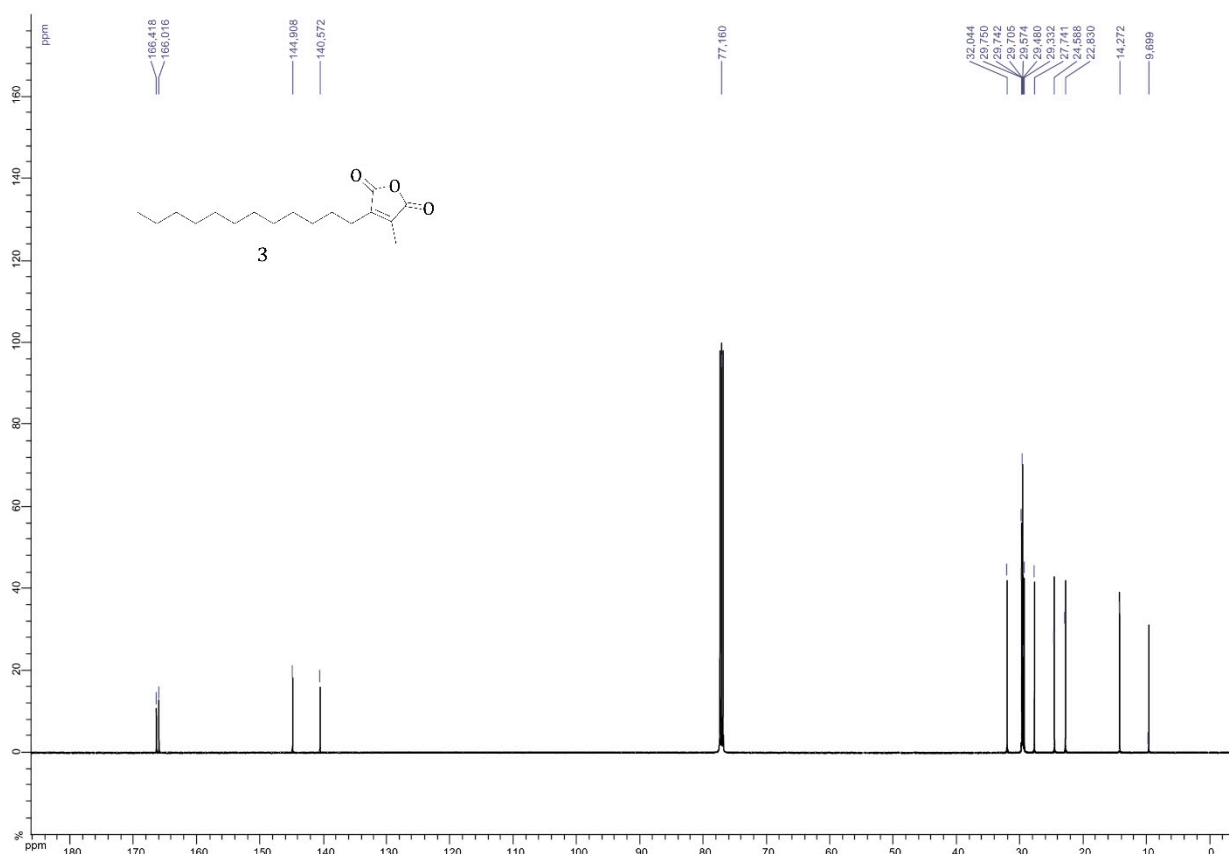

**Figure S6.**  $^{13}\text{C}$ -NMR of compound **3**.

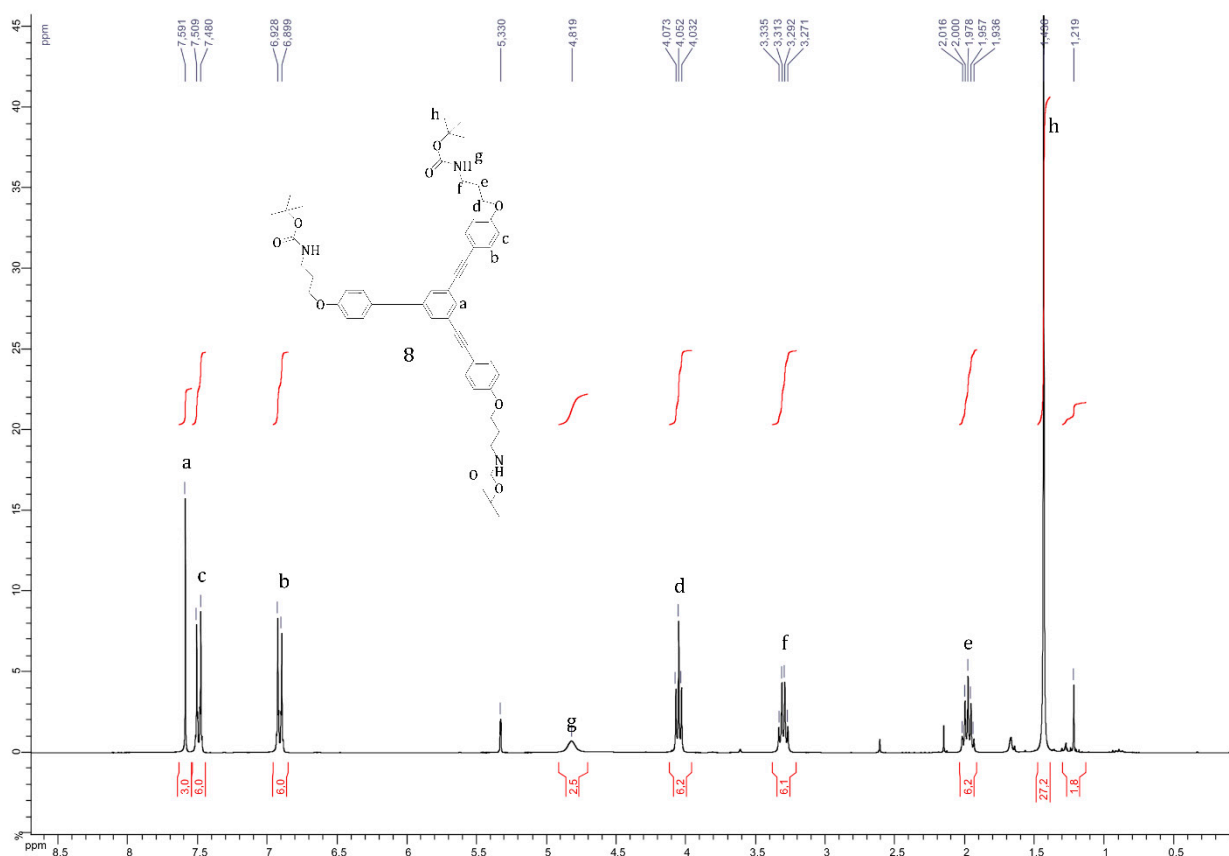

**Figure S7.**  $^1\text{H}$ -NMR of compound **8**.

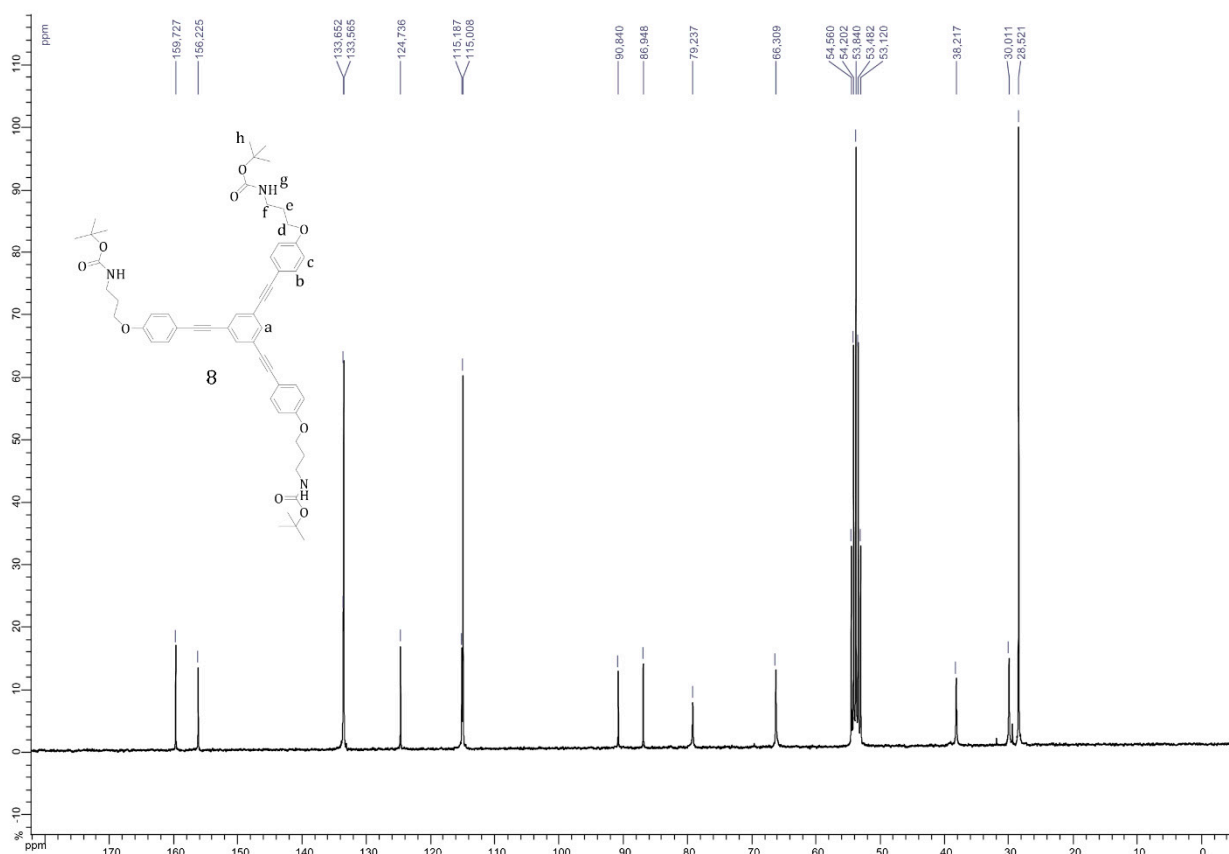



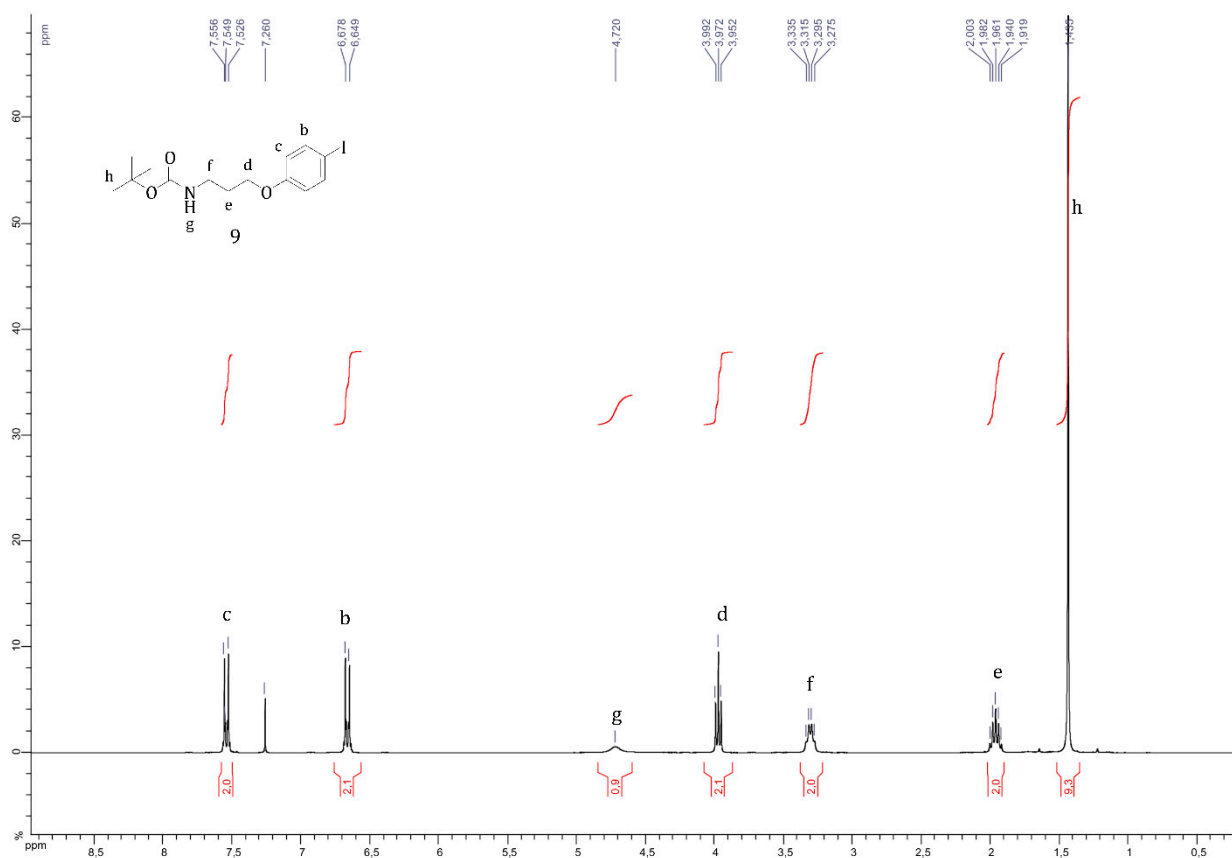

**Figure S9.**  $^1\text{H}$ -NMR of compound **9**.

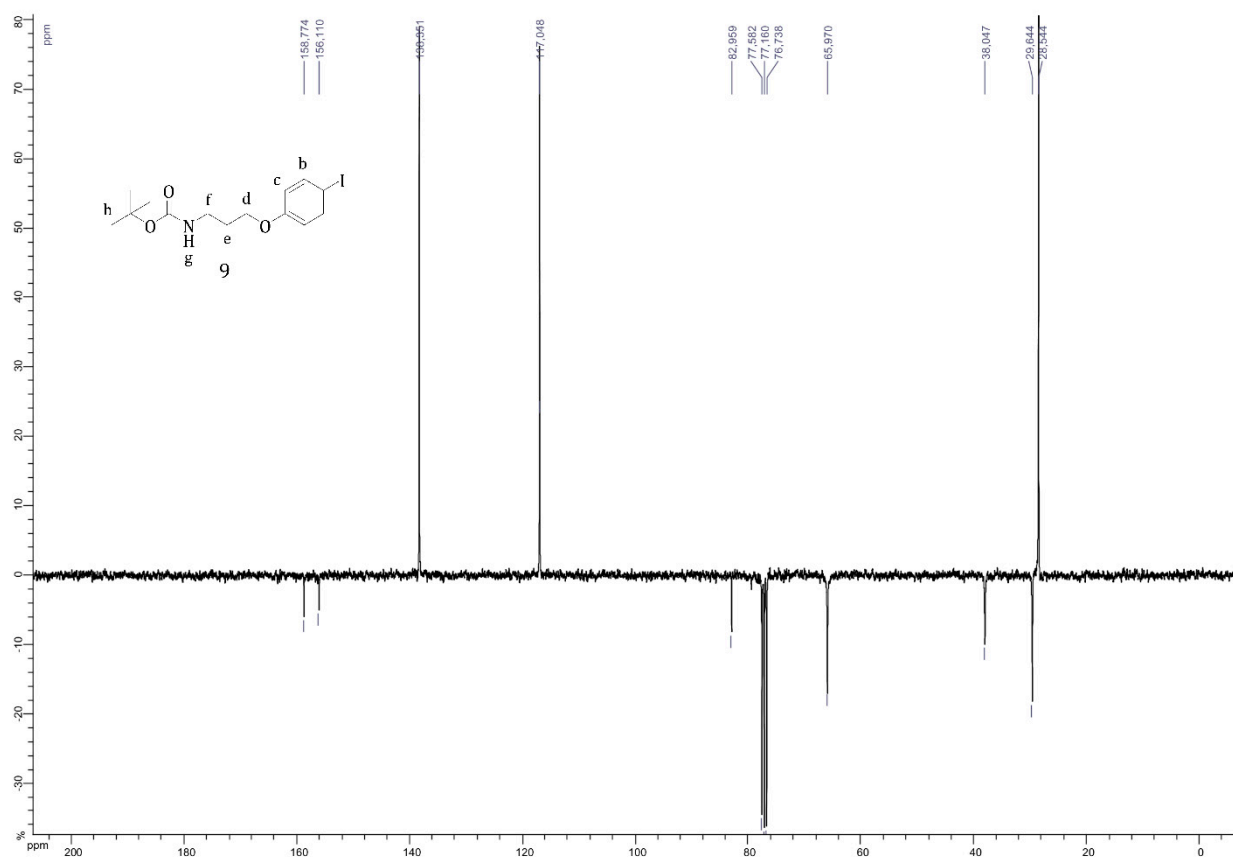

**Figure S10.**  $^{13}\text{C}$ -NMR of compound **9**.
